# Supplementary material for: Functionalized ferrocenes and ferroceniums: synthesis, crystal structures and electrochemical properties based on carbazole/phenothiazine-ferrocene conjugated molecules
Source: Royal Society of Chemistry journal article supplement (doi:10.1039/b900705a), 2009-01-01
Supplement: b900705a.pdf [file b900705a.pdf]

Supporting information:

## Functionalized ferrocenes and ferroceniums: synthesis, crystal structures and electrochemical properties based on carbazole/phenothiazine-ferrocene conjugated molecules

Xu-Chun Wang,<sup>a,e</sup> Yu-Peng Tian,<sup>\*a,c,d</sup> Yu-He Kan,<sup>\*b</sup> Cong-Yu Zuo,<sup>a</sup> Jie-Ying Wu,<sup>a</sup>  
Bao-Kang Jin,<sup>\*a</sup> Hong-Ping Zhou,<sup>a</sup> Jia-Xiang Yang,<sup>a</sup> Sheng-Yi Zhang,<sup>a</sup> Xu-Tang Tao,<sup>c</sup>  
Min-Hua Jiang<sup>c</sup>

<sup>a</sup> Department of Chemistry, Anhui Province Key Laboratory of Functional Inorganic Materials, Anhui University, Hefei, 230039, P. R. China. Fax: +86-551-5107304; Tel: +86-551-5108151; E-mail: yptian@ahu.edu.cn; bkjinhf@yahoo.com.cn.

<sup>b</sup> Department of Chemistry, Jiangsu Province Key Laboratory for Chemistry of Low-Dimensional Materials, Huaiyin Teachers College, Huaian 223001 P. R. China. E-mail: yhkan@yahoo.cn.

<sup>c</sup> State Key Laboratory of Crystal Materials, Shandong University, Jinan, 250100, P. R. China.

<sup>d</sup> State Key Laboratory of Coordination Chemistry, Nanjing University, Nanjing, 250100, P. R. China.

<sup>e</sup> Department of Chemistry, Anhui science and Technology University, Fengyang, Anhui, 233100, P. R. China.

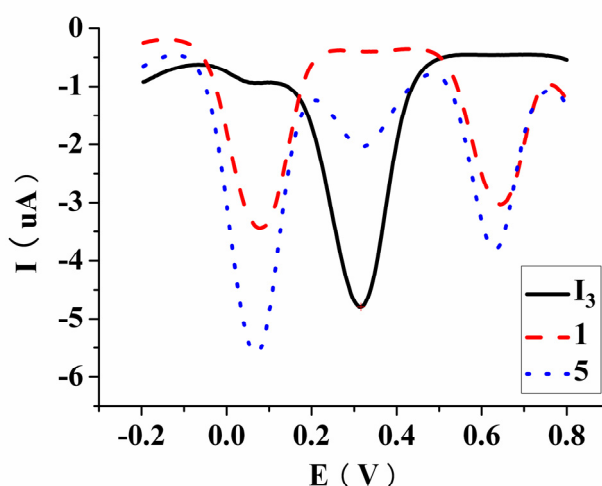

**Fig. S1** Differential pulse voltammetry (DPV) response of 1 mM solution of **1** and **5** at the same scan rate of 50 mV/s in CH<sub>2</sub>Cl<sub>2</sub> with 0.1 M TBAP at room temperature (Vs. Ag/AgCl; scan range: -0.2~0.8 V)

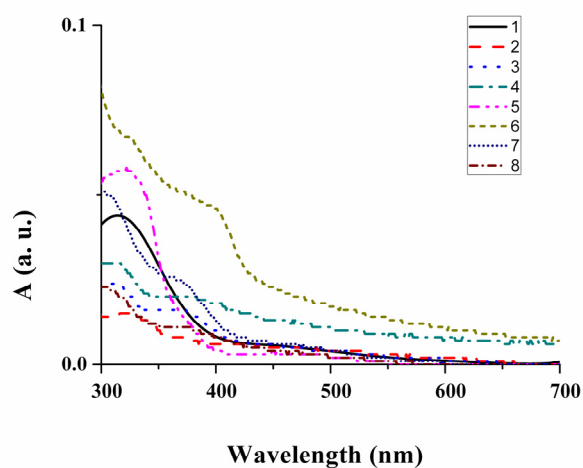

**Fig. S2** The linear absorption spectra of **1-8** ( $1 \times 10^{-5}$  mol L<sup>-1</sup>) in benzene.

**Table S1.** Comparison of atomic distances (Å) and angles (°) for **1, 2, 3, 5**.

|             | <b>1</b>     | <b>2</b>                                           | <b>3</b>     | <b>5</b>     |
|-------------|--------------|----------------------------------------------------|--------------|--------------|
| C=C         | 1.240(6)     | 1.308(8)/ 1.333(8)                                 | 1.329(5)     | 1.173(1)     |
| C-Cp        | 1.379        | 1.399 (Fe <sub>1</sub> )/ 1.399 (Fe <sub>2</sub> ) | 1.395        | 1.391        |
| Fe(i)~C     | 2.026        | 2.025(Fe <sub>1</sub> )/ 2.027 (Fe <sub>2</sub> )  | 2.028        | 2.066        |
| Fe(i)~Cp    | 1.650, 1.651 | 1.644,1.637; 1.644,1.639                           | 1.638, 1.641 | 1.692, 1.696 |
| Stag-Cp     | 17.00        | 3.39 (Fe <sub>1</sub> )/ 16.61 (Fe <sub>2</sub> )  | 3.31         | 2.37         |
| Dihe-Cp     | 0.87         | 2.65 (Fe <sub>1</sub> )/ 0.84 (Fe <sub>2</sub> )   | 1.07         | 3.00         |
| Dihe-Cp-ben | 16.51        | 9.77 (Fe <sub>1</sub> )/ 5.95 (Fe <sub>2</sub> )   | 6.47         | 8.40         |
| Dihe-ben    | 2.16         | 4.63                                               | 39.70        | 2.04         |

**Table S2.** Calculated energy (eV), composition (%) of selected frontier orbitals for **1-4** with BP/TZP method.

| Orbital         | L+5  | L+4  | L+3  | L+2  | L+1  | L    | H    | H-1  | H-2  | H-3  | H-4  | H-5  |
|-----------------|------|------|------|------|------|------|------|------|------|------|------|------|
| <b>1</b>        |      |      |      |      |      |      |      |      |      |      |      |      |
| E / eV          | -3.9 | -4.4 | -4.8 | -4.9 | -5.4 | -5.7 | -8.1 | -8.2 | -8.5 | -8.6 | -9.0 | -9.4 |
|                 | 7    | 7    | 3    | 9    | 9    | 7    | 2    | 4    | 2    | 8    | 9    | 3    |
| Fe <sub>1</sub> | 0.5  | 2.1  | 38.3 | 55.3 | 7    | 10.6 | 62.7 | 83.2 | 31.8 | 83.1 | 1    | 2.3  |
| Cp <sub>1</sub> | 3.7  | 4.8  | 37   | 44.2 | 5.6  | 9.4  | 12.1 | 16.4 | 17   | 8.4  | 4.4  | 22.5 |
| Spacer          | 95.8 | 93.1 | 24.7 | 0.6  | 87.4 | 79.9 | 25.2 | 0.4  | 51.2 | 8.5  | 94.6 | 75.3 |
| <b>2</b>        |      |      |      |      |      |      |      |      |      |      |      |      |
| E / eV          | -4.8 | -4.9 | -5.0 | -5.5 | -5.6 | -5.7 | -8.0 | -8.2 | -8.2 | -8.2 | -8.5 | -8.6 |
|                 | 2    | 8    | 1    | 3    | 2    | 9    | 9    | 0    | 7    | 8    | 1    | 6    |
| Fe <sub>1</sub> | 18.1 | 55.0 | 0.0  | 7.0  | 3.6  | 8.7  | 23.4 | 38.2 | 0.0  | 82.7 | 18.3 | 26.1 |
| Cp <sub>1</sub> | 17.9 | 44.5 | 0.0  | 5.7  | 3.0  | 7.5  | 5.3  | 7.3  | 0.0  | 17.0 | 8.7  | 6.0  |
| Fe <sub>2</sub> | 23.2 | 0.0  | 54.9 | 7.8  | 3.3  | 8.0  | 29.0 | 33.9 | 82.9 | 0.0  | 21.8 | 46.7 |
| Cp <sub>2</sub> | 23.2 | 0.0  | 44.6 | 6.3  | 2.8  | 7.0  | 6.4  | 6.4  | 16.8 | 0.0  | 10.1 | 5.4  |
| Spacer          | 17.6 | 0.5  | 0.5  | 73.1 | 87.4 | 68.8 | 36.0 | 14.2 | 0.2  | 0.2  | 41.0 | 15.7 |
| <b>3</b>        |      |      |      |      |      |      |      |      |      |      |      |      |
| E / eV          | -4.7 | -4.9 | -5.0 | -5.0 | -5.1 | -5.8 | -8.1 | -8.3 | -8.4 | -8.7 | -8.9 | -9.4 |
|                 | 2    | 4    | 6    | 9    | 2    | 6    | 6    | 3    | 2    | 4    | 9    | 7    |
| Fe <sub>1</sub> | 7.9  | 32.9 | 53.3 | 3.3  | 1.4  | 14.0 | 43.1 | 83.0 | 37.3 | 87.2 | 10.9 | 1.1  |
| Cp <sub>1</sub> | 10.7 | 29.3 | 43.3 | 2.6  | 1.1  | 12.2 | 9.1  | 16.7 | 10.2 | 7.5  | 21.9 | 11.0 |
| Spacer          | 81.4 | 37.7 | 3.3  | 94.1 | 97.4 | 73.8 | 47.7 | 0.3  | 52.5 | 5.3  | 67.2 | 87.9 |
| <b>4</b>        |      |      |      |      |      |      |      |      |      |      |      |      |
| E / eV          | -5.0 | -5.0 | -5.0 | -5.1 | -5.7 | -5.9 | -8.0 | -8.2 | -8.3 | -8.3 | -8.4 | -8.7 |
|                 | 4    | 5    | 8    | 2    | 7    | 5    | 9    | 4    | 1    | 3    | 2    | 0    |
| Fe <sub>1</sub> | 0.5  | 53.4 | 5.5  | 1.2  | 7.7  | 6.7  | 17.1 | 36.0 | 0.6  | 83.0 | 25.2 | 3.5  |
| Cp <sub>1</sub> | 0.4  | 43.4 | 4.4  | 0.9  | 6.6  | 5.9  | 4.2  | 6.8  | 0.1  | 16.8 | 7.2  | 0.7  |
| Fe <sub>2</sub> | 53.5 | 0.7  | 5.7  | 1.4  | 7.6  | 6.8  | 19.3 | 39.2 | 82.1 | 0.0  | 22.0 | 85.1 |
| Cp <sub>2</sub> | 43.4 | 0.5  | 4.6  | 1.2  | 6.5  | 6.1  | 4.6  | 7.4  | 16.8 | 0.0  | 6.8  | 7.3  |
| Spacer          | 2.2  | 2.0  | 79.8 | 95.2 | 71.7 | 74.6 | 54.7 | 10.6 | 0.4  | 0.2  | 38.8 | 3.3  |
